# Supplementary material for: AXL inhibition suppresses early allograft monocyte-to-macrophage differentiation and prolongs allograft survival
Source: JCI journal article supplement (doi:10.1172/jci.insight.178502), 2024-01-23
Supplement: sd1 [file 1]

CD45.2<sup>+</sup>CD11b<sup>+</sup>

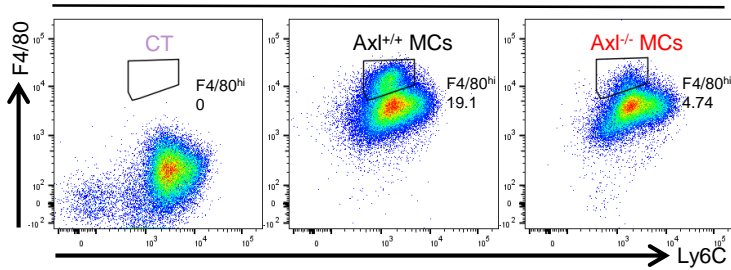

**Supplemental Figure 1: MC-intrinsic Axl expression is required for iM $\phi$  differentiation. (A)** Representative flow cytometry plots were obtained four days (Day 4) after culture of CD45.2<sup>+</sup>CD11b<sup>+</sup>Ly6C<sup>+</sup> Axl<sup>-/-</sup> MCs alone, or co-culture of Axl<sup>+/+</sup> MCs or Axl<sup>-/-</sup> MCs with allogeneic Axl<sup>+/+</sup> BMDMs.

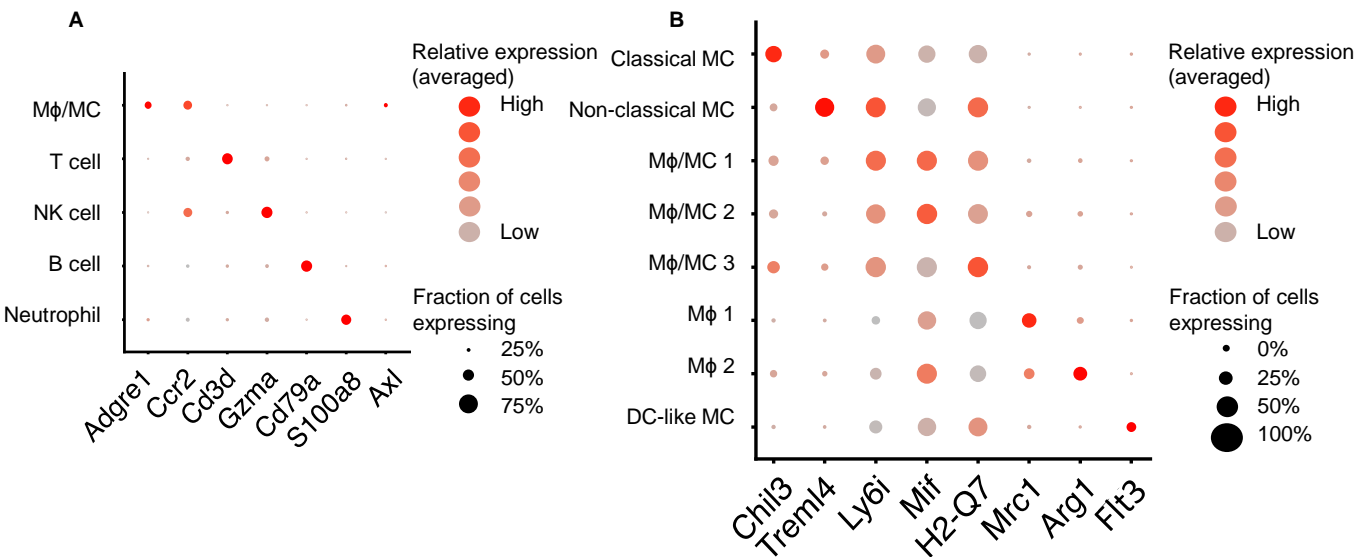

**Supplemental Figure 2: Cluster-defining genes of heart allograft UMAP plots. (A)** Dot plot demonstrating expression pattern of cluster-enriched canonical marker genes among all *Ptpnc* (CD45)-positive cells. **(B)** Dot plot demonstrating expression pattern of Mφ/MC sub cluster-specific marker genes.
